# Supplementary material for: Autophagy Is Indispensable for the Self-Renewal and Quiescence of Ovarian Cancer Spheroid Cells with Stem Cell-Like Properties
Source: PubMed Central journal article supplement (PMC6167563; doi:10.1155/2018/7010472), 2018-09-17

Figure S3

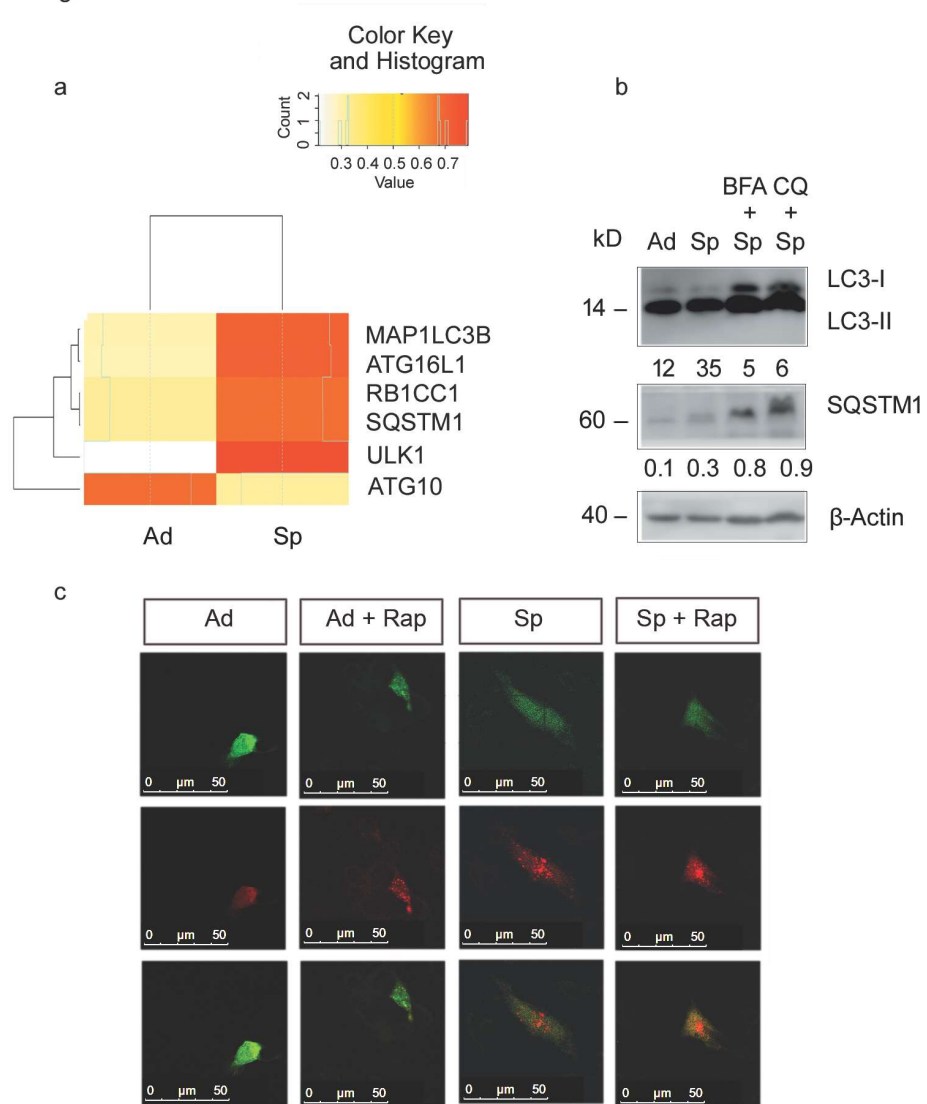

Supplement: 7010472.f3.pdf [file 7010472.f3.pdf]
