# Supplementary material for: Autophagy Is Indispensable for the Self-Renewal and Quiescence of Ovarian Cancer Spheroid Cells with Stem Cell-Like Properties
Source: PubMed Central journal article supplement (PMC6167563; doi:10.1155/2018/7010472), 2018-09-17

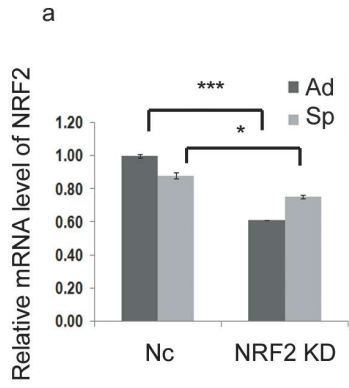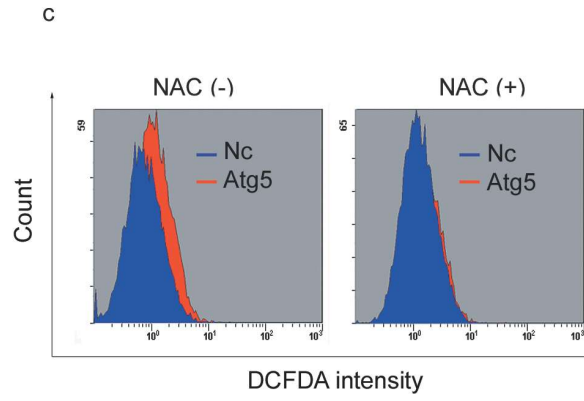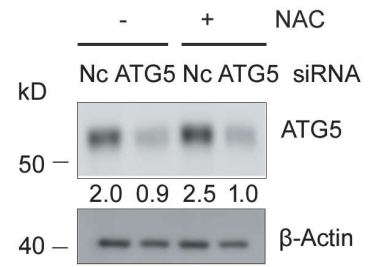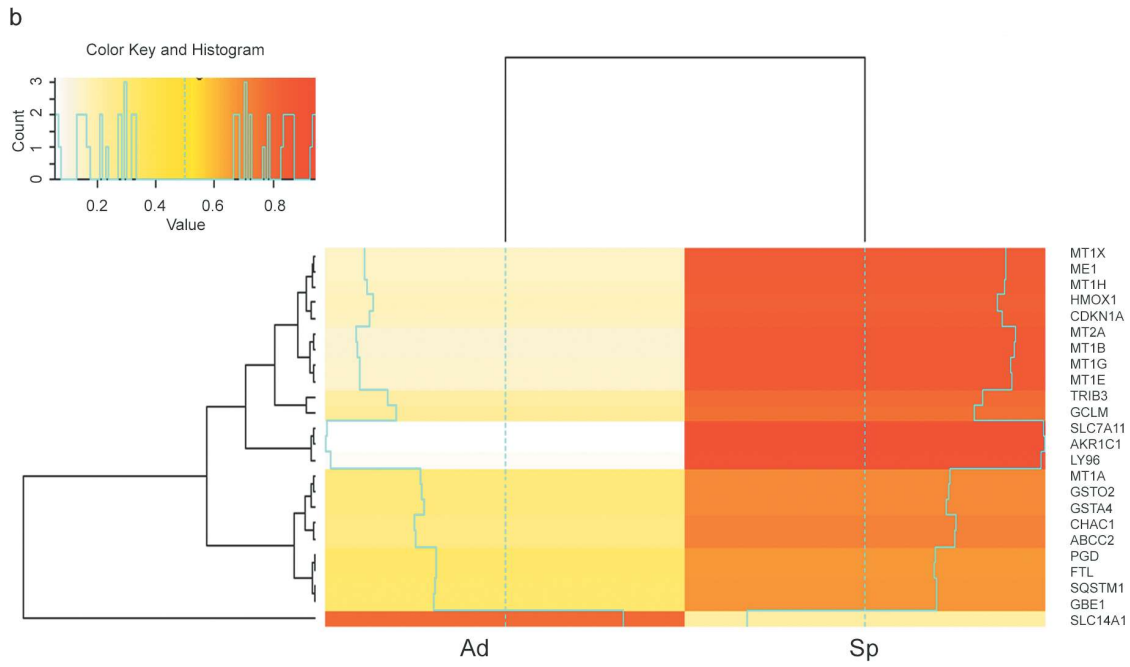

Supplement: 7010472.f4.pdf [file 7010472.f4.pdf]
